# Supplementary material for: MicroRNA Associated with the Invasive Phenotype in Clear Cell Renal Cell Carcinoma: Let-7c-5p Inhibits Proliferation, Migration, and Invasion by Targeting Insulin-like Growth Factor 1 Receptor
Source: MDPI journal article supplement (doi:10.3390/biomedicines10102425), 2022-09-28
Supplement: s1 [file s1]

## Supplemental Material

Wild-type sequence for the three constructs comprising the full-length 3'UTR of IGF1R that were utilized in this study. The three mutated sites are highlighted in blue, and the mutated sequence is detailed in the header preceding each construct.

>HmiT100884a: sites 99-105 changed from tacctca to atggagt

```
GATCCTTGGATCCTGAATCTGTGCAAAACAGTAACGTGTGCGCACGCGCAGCGGGGTGGGGGGGGAGAGAGA
GTTTTAACAAATCCATTACACAAGCCTCCTGTACCTCAAGTGGATCTTCAGAACTGCCCTTGCTGCCCCGCGGGAGA
CAGCTTCTCTGCAGTAAACACATTTGGGATGTTCTTTTTTCAATATGCAAGCAGCTTTTTATTCCCTGCCCA
AACCTTAACTGACATGGGCCCTTAAGAACCTTAATGACAACACTTAATAGCAACAGAGCACTTGAGAACC
AGTCTCCTCACTCTGTCCCTGTCCCTGTTCTCCCTTTCTCTCTCCTCTCTGCTTCATAACGGAAAAATAAT
TGCCACAAGTCCAGCTGGGAAGCCCTTTTTATCAGTTTGAGGAAGTGGCTGTCCCTGTGGCCCCATCCAACC
ACTGTACACACCCGCTGACACCGTGGGTCAATACAAAAAACACGTGGAGATGGAAATTTTACCTTTATC
TTTACCTTTCTAGGGACATGAAATTTACAAAGGGCCATCGTTCATCCAAGGCTGTTACCATTTTAACGCTGC
CTAATTTTGCCAAAATCCTGAACCTTTCTCCCTCATCGGCCCGGCGCTGATTCCTCGTGTCCGGAGGCATGGGT
GAGCATGGCAGCTGGTTGCTCCATTTGAGAGACACGCTGGCGACACACTCCGTCCATCCGACTGCCCTGCT
GTGCTGCTCAAGGCCACAGGCACACAGGTCTCATTGCTTCTGACTAGATTATTATTTGGGGAACTGGACAC
AATAGGTCTTTCTCTCAGTGAAGGTGGGGAGAAGCTGAACCGGCTTCCCTGCCCTGCCTCCCCAGCCCCCTG
CCCAACCCCCAAGAATCTGGTGGCCATGGGCCCCGAAGCAGCCTGGCGGACAGGCTTGAGTCAAGGGGCC
CCATGCCTGCTTCTCTCCAGCCCCAGCTCCCCCGCCCGCCCCCAAGGACACAGATGGGAAGGGGTTTCCAG
GGACTCAGCCCCACTGTTGATGCAGGTTTGCAAGGAAAGAAATTCAAACACCACAACAGCAGTAAGAAGA
AAAGCAGTCAATGGATTCAAGCATTCTAAGCTTTGTTGACATTTTCTCTGTTCTAGGACTTCTTCATGGGTCT
TACAGTTCTATGTTAGACCATGAAACATTTGCATACACATCGTCTTTAATGTCATTTTATAACTTTTTTACGG
TTCAGATATTCATCTATACGCTGTACAGAAAAAAAAGCTGCTATTTTTTTTGTCTTGATCTTTGTGGATT
TAATCTATGAAAACCTTCAGGTCCACCCTCTCCCCTTTCTGCTCACTCCAAGAACTTCTTATGCTTTGTAATA
GAGTGCGTGACTTTCTTCCCTCTTTCCCGGTAATGGATACTTCTATCACATAATTTGCCATGAAGTGTGGATG
CCTTTTTATAAATACATCCCCCATCCCTGCTCCCACTGCCCTTTAGTTGTTTTCTAACCCGTAGGCTCTCTGG
GCACGAGGCAGAAAGCAGGCCGGGCACCCATCCTGAGAGGGCCGCGCTCCTCTCCCCAGCCTGCCCTCACA
GCATTGGAGCCTGTTACAGTGCAAGACATGATACAAACTCAGGTCAGAAAAACAAAGGTTAAATATTTTAC
ACGTCTTTGTTTCACTGTTTCCACTACCCGTGGTTGAGAAGCCTCACCTCTCTTTCCCTTGCTTTGCTTAGGTT
GTGACACACATATATATATATTTTTTTAATTCTTGGGTACAACAGCAGTGTTAACCGCAGACACTAGGCATTT
GGATTACTATTTTTCTTAATGGCTATTTAATCCTTCCATCCACGAAAAACAGCTGCTGAGTCCAAGGGAGCA
GCAGAGCGTGGTCCGGCAGGGCCTGTTGTGGCCCTCGCCACCCCCCTCACCGGACCGACTGACCTGTCTTTG
GAACCAGAACATCCCAAGGGAACCTCTCGCACTGGCGTTGAGTGGGACCCCGGGATCCAGGCTGGCCAG
GGCGGCACCCTCAGGGCTGTGCCCCTGGAGTGCTAGGTGGAGGCAGCACAGACGCCACGGTGGCCCAAGA
GCCCCCTTGCTTCTTGCTGGGGGACCAGGGCTGTGGTGTGCCCCACTTTCCCTCGGCCAGGAATCCAGGTCC
TTGGGGCCAGGGTCTTGCTTGTTCATTTTTAGCACTTCTACCAGAGAGATGACAGCACAAGAGTTGCT
TCTGGGATAGAAATGTTTAGGAGTAAGAACAAAGCTGGGATACGGTGATTGCTAGTTGTGACTGAAGATTCA
ACACAGAAAAGAAAGTTTATACGGCTTTTTTGTGCTGAGCAGTTTGTCCCACTGCTTTCTCTAGTCTCTATCC
CATAGCGTGTTCCTTTAAAAAAGGTTATTATATGTAGGAGTTTCTTTTAAATTTATTGTTGATA
AATTACCAGTTTCAATCACTGTAGAAAAGCCCCATTATGAATTTAAATTTCAAGGAAAGGGTGTGTGTGTGT
GTATGTGTGGGGTGTGTGTGTGTGAGAGTGATGGGACAGTTCCTGATT
```

>HmiT100884b: sites 2619-2626 changed from ctacctca to gatggagt

```
CAATCACTGTAGAAAAGCCCCATTATGAATTTAAATTTCAAGGAAAGGGTGTGTGTGTGTGTATGTGTGGGG
TGTGTGTGTGTGAGAGTGATGGGACAGTTCTTGATTTTTTGGGTTTTTTTTTCCCCCAAACATTTATCTACCTCAC
TCTTATTTTTTATATGTGTATATAGACAAAAGAATACATCTCACCTTTCTCAGCACCTGACAATAGGCCGTTG
ATACTGGTAACCTCATCCACGCCACAGGCGCCACACCCAGGTGATGCAGGGGGAAGCCAGGCTGTATTCCG
GGGTCAAAGCAACACTAACTCACCTCTCTGCTCATTTCAGACAGCTTGCCTTTTTCTGAGATGTCCTGTTTGT
```

GTGCTTTTTTGTGTTTCTATCTTGGTTTCCACCAAGGTGTTAGATTTCTCCTCCTCCTAGCCAGGTGGCC  
CTGTGAGGCCAACGAGGGCACCAGAGCACACCTGGGGGAGCCACCAGGCTGTCCCTGGCTGGTTGTCTTTG  
GAACAAACTGCTTCTGTGCAGATGGAATGACCAACACATTTCTGCTTAAGAGAGCAGTGGTTCCTCAGGTT  
CTGAGGAGAGGAAGGTGTCCAGGCAGCACCATCTCTGTGCGAATCCCCAGGGTAAAGGCGTGGGGCATTGG  
GTTTGTCCCCTTGCTGCTGCTCCATCCCTGCAGGAGGCTCGCGCTGAGGCAGGACCGTGCGGCCATGGCTGC  
TGCATTCATTGAGCACAAAGGTGCAGCTGCAGCAGCAGCTGGAGAGCAAGAGTCACCCAGCCTGTGCGCCA  
GAATGCAGAGGCTCCTGACCTCACAGCCAGTCCCTGATAGAACACACGCAGGAGCAGAGTCCCCCTCCCCCT  
CCAGGCTGCCCTCTCAACTTCTCCCTCACCTCCTTCCCTAGGGGTAGACAGAGATGTACCAAACCTTCCGGCT  
GGAAAGCCCAGTGGCCGGCGCCGAGGCTCGTGGCGTCACGCCCCCCCCGCCAGGGCTGTACCTCCGTCTCCC  
TGGTCTGTGCTCACAGGACAGACGGCTCGCTCCCCCTCTCCAGCAGCTGCTCTTACAGGCACTGATGATT  
CGCTGGGAAGTGTGGCGGGCAGCTTTGCCTAAGCGTGGATGGCTCCTCGGCAATTCCAGCCTAAGTGAAGGC  
GCTCAGGAGCCTCCTGCTGGAACGCGACCCATCTCTCCAGGACCCCCGGGGATCTTAAGGTCATTGAGAAAT  
ACTGTTGGATCAGGGTTTTGTTCTTCCACACTGTAGGTGACCCCTTGAATAACGGCCTCTCCTCTCGTGAC  
ATACCTACCGGTTTCCACAACCTGGATTCTACAGATCATTAGCTGGTTATAAGGGTTTTGTTAAACTGTCCG  
AGTTACTGATGTCATTTTGTGTTTTGTTTTATGTAGGTAGCTTTAAGTAGAAAACACTAACAGTGTAGTGCCCA  
TCATAGCAAATGCTTCAGAAACACCTCAATAAAAAGAGAAAACCTTGGCTTGTGTGATGGTGCAGTCACTTTAC  
TGGACCAACCCACCCACCTTGACTATACCAAGGCATCATCTATCCACAGTTCTAGCCTAACTTCATGCTGATT  
TCTCTGCCTCTTGATTTTTCTCTGTGTGTTCCAAATAATCTTAAGCTGAGTTGTGGCATTITCCATGCAACCTCC  
TTCTGCCAGCAGCTCACACTGCTTGAAGTCATATGAACCACTGAGGCACATCATGGAATTGATGTGAGCATT  
AAGACGTTCTCCACACAGCCCTTCCCTGAGGCAGCAGGAGCTGGTGTGTACTGGAGACACTGTTGAACCTG  
ATCAAGACCCAGACCACCCAGGCTCTCCTTCGTGGGATGTCATGACGTTTGACATACCTTTGGAACGAGCCT  
CCTCCTTGGAAGATGGAAGACCGTGTTCTGTGGCCGACCTGGCCTCTCCTGGCCTGTTTCTTAAGATGCGGAGT  
CACATTTCAATGGTACGAAAAGTGGCTTCGTAAAATAGAAGAGCAGTCACTGTGGAACCTACCAATGGCGA  
GATGCTCGGTGCACATTGGGGTGCTTTGGGATAAAAAGATTTATGAGCCAACTATTCTCTGGCACCAGATTCTA  
GGCCAGTTTGTTCCTGAAGCTTTTCCACAGCAGTCCACCTCTGCAGGCTGGCAGCCGAATGGCTTGCCA  
GTGGCTCTGTGGCAAGATCACACTGAGATCGATGGGTGAGAAGGCTAGGATGCTTGCTAGTGTTCTTAGCT  
GTCACGTTGGCTCCTTCCAGGGTGGCCAGACGGTGTTGGCCACTCCCTTCTAAAACACAGGCGCCCTCCTGGT  
GACAGTGACCCGCCGTGGTATGCCTTGGCCATTCCAGCAGTCCCAGTTATGCATTTCAAGTTTGGGGTTTGT  
TCT

>HmiT100884c: sites 6661-6667 changed from ctacctc to gatggag

CATTCCAGCAGTCCCAGTTATGCATTTCAAGTTTGGGGTTTGTCTTTTCGTTAATGTTTCCTCTGTGTTGTCAGC  
TGTCTTCATTTCTGGGCTAAGCAGCATTGGGAGATGTGGACCAGAGATCCACTCCTTAAGAACCAGTGGCG  
AAAGACACTTTCTTCTTCACTCTGAAGTAGCTGGTGGTACAAATGAGAACTTCAAGAGAGGATGTTATTTAG  
ACTGAACCTCTGTTGCCAGAGATGCTGAAGATACAGACCTTGGACAGGTCAGAGGGTTTCATTTTTGGCCTTC  
ATCTTAGATGACTGGTTGCGTCATTTGGAGAAGTGAGTGCTCCTTGATGGTGAATGACCGGGTGGTGGGTA  
CAGAACCATTGTCACAGGGATCCTGGCACAGAGAAGAGTTACGAGCAGCAGGGTGCAGGGCTTGAAGGA  
ATGTGGGCAAGGTTTTGAACCTGATTGTTCTTGAAGCTATCAGACCACATCGAGGCTCAGCAGTCATCCGTGG  
GCATTTGGTTTCAACAAAGAAACCTAACATCCTACTCTGGAACTGATCTCGGAGTTAAGGCGAATTGTTCA  
AGAACACAACTACATCGCACTCGTCAGTTGTCAGTTCTGGGGCATGACTTTAGCGTTTTGTTTCTGCGAGAA  
CATAACGATCACTCATTTTTATGTCCCACGTGTGTGTGTCCGCATCTTTCTGGTCAACATTGTTTTAACTAGTC  
ACTCATTAGCGTTTTCAATAGGGCTCTTAAGTCCAGTAGATTACGGGTAGTCAGTTGACGAAGATCTGGTTTA  
CAAGAACTAATTAATGTTTCATTGCATTTTTGTAAGAACAGAATAATTTTATAAAATGTTTGTAGTTTATAAT  
TGCCGAAAATAATTTAAAGACACTTTTTTTTTCTCTGTGTGTGCAAATGTGTGTTTGTGATCCATTTTTTTTTT  
TTTTTTAGGACACCTGTTTACTAGCTAGCTTTACAATATGCCAAAAAAGGATTTCTCCCTGACCCCATCCGTG  
GTTACCCCTCTTTTCCCCCATGCTTTTTGCCCTAGTTTATAACAAAGGAATGATGATGATTTAAAAAGTAGTT  
CTGTATCTTCAGTATCTTGGTCTTCCAGAACCCTCTGGTTGGGAAGGGGATCATTTTTTACTGGTCATTTCCCTT  
TGGAGTGTAGCTACTTTAACAGATGGAAAGAACCTCATTGGCCATGGAAACAGCCGAGGTGTTGGAGCCCA  
GCAGTGCATGGCACCGTTCCGGCATCTGGCTTGATTGGTCTGGCTGCCGTCATTGTCAGCACAGTGCCATGGAC  
ATGGGAAGACTTGACTGCACAGCCAATGGTTTTTCATGATGATTACAGCATACACAGTGATCACATAAACGAT

GACAGCTATGGGGCACACAGGCCATTTGCTTACATGCCTCGTATCATGACTGATTACTGCTTTGTTAGAACAC  
 AGAAGAGACCCTATTTTATTTAAGGCAGAACCCCGAAGATACGTATTTCCAATACAGAAAAGAATTTTAAAT  
 AAAAACTATAACATACACAAAAATTGGTTTTAAAGTTGACTCCACTTCCTCTAACTCCAGTGGATTGTTGGCC  
 ATGTCTCCCCAACTCCACAATATCTCTATCATGGGAAACACCTGGGGTTTTTTCGCTACATAGGAGAAAGAT  
 CTGGAAACTATTTGGGTTTTGTTTTCAACTTTTCATTTGGATGTTTGGCGTTGCACACACACATCCACCGGTGG  
 AAGAGACGCCCCGTGAAAACACCTGTCTGCTTTCTAAGCCAGTGAGGTTGAGGTGAGAGGTTTGCCAGAGTT  
 TGTCTACCTCTGGGTATCCCTTTGTCTGGGATAAAAAAAATCAAACCAGAAGGCGGGATGGAATGGATGCAC  
 CGCAAATAATGCATTTTCTGAGTTTTCTTGTTAAAAAAAATTTTTTAAGTAAGAAAAAAAAGGTAATAA  
 CATGGCCAATTTGTTACATAAAATGACTTTCTGTGTATAAATTATTCCTAAAAAATCCTGTTTATATAAAAAA  
 TCAGTAGATGAAAAAAATTTCAAATGTTTTGTATATTCTGTTGTAAGAATTTATTCCTGTTATTGCGATATA  
 CTCTGGATTCTTTACATAATGGAAAAAAGAACTGTCTATTTGAATGGCTGAAGCTAAGGCAACGTTAGTTT  
 CTCTTACTCTGCTTTTTTCTAGTAAAGTACTACATGGTTTAAGTTAAATAAAATAATTCTGTATGCATT

Relative let-7c-5p expression in transfectants relative to corresponding negative controls.

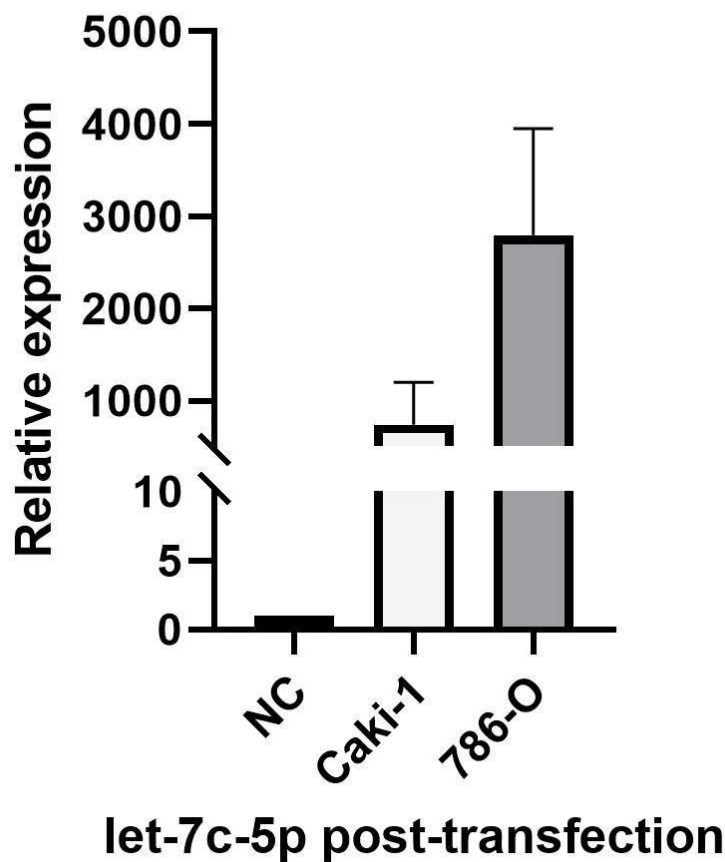

The KEGG pathway ECM-receptor interaction. This pathway facilitates cellular activities such as adhesion, migration, differentiation, proliferation, and apoptosis (<https://www.genome.jp/pathway/hsa04512>, Kanehisa Lab).

# ECM-RECEPTOR INTERACTION

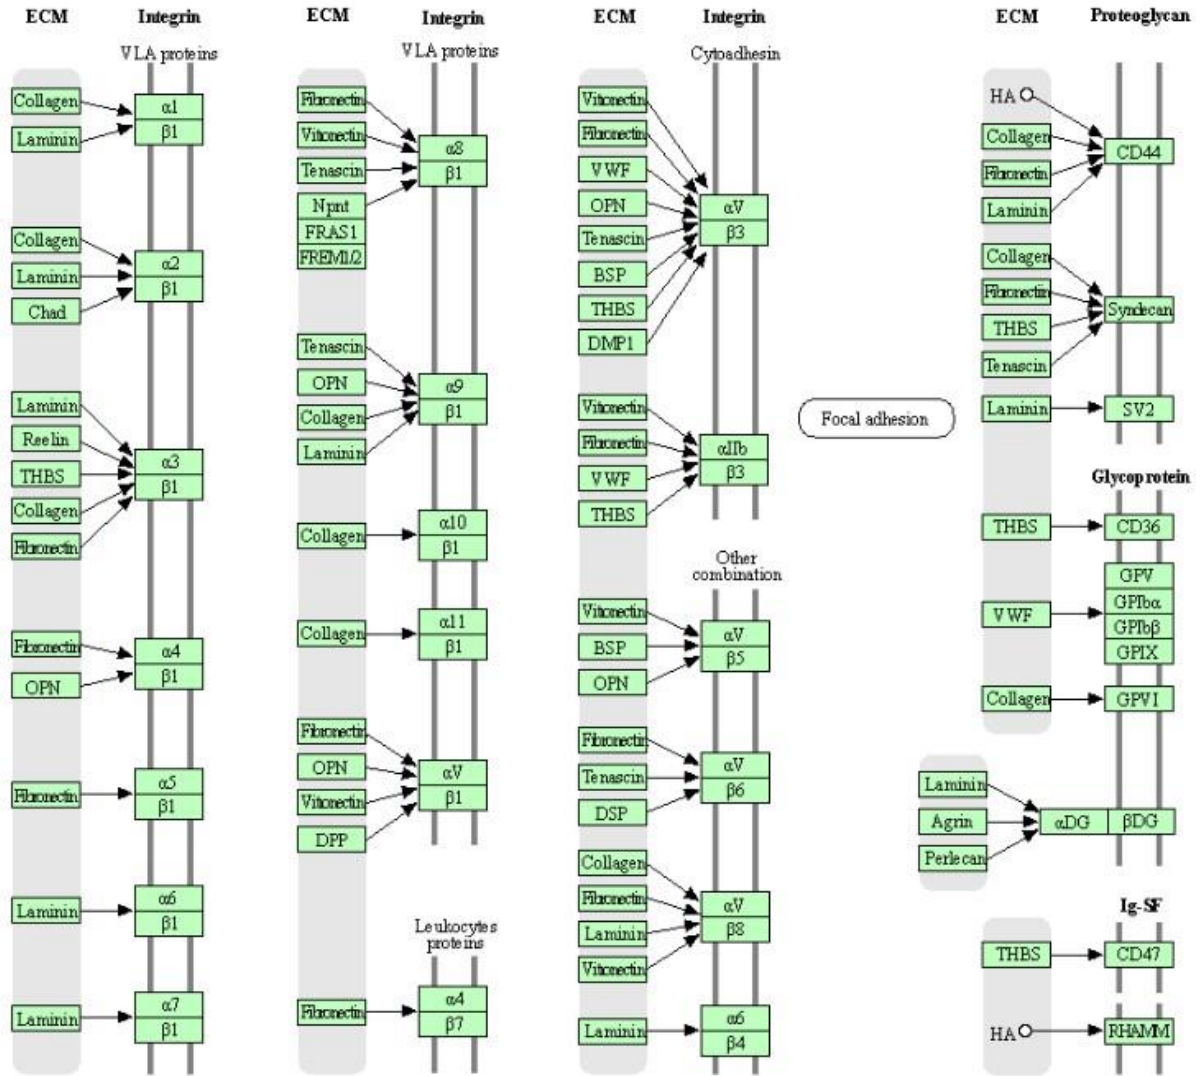

A list of genes targeted by at least two members of the let-7 family in this study (let-7a-5p, -7b-5p, -7c5p, -7d-5p, and -7e-5p). The number of matches refers to the number of unique let-7 family members identified by microT-CDS (threshold 0.8) for each gene.

| Gene       | Ensembl ID      | let-7 matches |
|------------|-----------------|---------------|
| ABCC5      | ENSG00000114770 | 5             |
| ABCC8      | ENSG00000006071 | 4             |
| ABCD4      | ENSG00000119688 | 4             |
| ABL2       | ENSG00000143322 | 5             |
| AC004381.6 | ENSG00000005189 | 4             |
| AC023632.1 | ENSG00000212997 | 5             |

|            |                 |   |
|------------|-----------------|---|
| ACP6       | ENSG00000162836 | 2 |
| ACSL6      | ENSG00000164398 | 5 |
| ACTA1      | ENSG00000143632 | 4 |
| ACTB       | ENSG00000075624 | 5 |
| ACTG2      | ENSG00000163017 | 5 |
| ACVR1B     | ENSG00000135503 | 5 |
| ACVR1C     | ENSG00000123612 | 5 |
| ACVR2A     | ENSG00000121989 | 5 |
| ADA        | ENSG00000196839 | 3 |
| ADAMTS12   | ENSG00000151388 | 5 |
| ADAMTS15   | ENSG00000166106 | 5 |
| ADAMTS5    | ENSG00000154736 | 5 |
| ADAMTS8    | ENSG00000134917 | 5 |
| ADAP2      | ENSG00000184060 | 5 |
| ADIPOR2    | ENSG00000006831 | 4 |
| ADRB1      | ENSG00000043591 | 5 |
| ADRB2      | ENSG00000169252 | 5 |
| ADRB3      | ENSG00000188778 | 5 |
| AEN        | ENSG00000181026 | 4 |
| AGAP1      | ENSG00000157985 | 3 |
| AGBL2      | ENSG00000165923 | 4 |
| AGO3       | ENSG00000126070 | 5 |
| AGO4       | ENSG00000134698 | 4 |
| AGPAT6     | ENSG00000158669 | 3 |
| AHCTF1     | ENSG00000153207 | 5 |
| AIFM1      | ENSG00000156709 | 5 |
| AKAP8      | ENSG00000105127 | 4 |
| AL136115.1 | ENSG00000212673 | 4 |
| ALG8       | ENSG00000159063 | 2 |
| ALPK1      | ENSG00000073331 | 4 |
| AMER3      | ENSG00000178171 | 4 |

|            |                 |   |
|------------|-----------------|---|
| ANKRD49    | ENSG00000168876 | 5 |
| AP000708.1 | ENSG00000255537 | 2 |
| AP1S1      | ENSG00000106367 | 2 |

|          |                 |   |
|----------|-----------------|---|
| ARG2     | ENSG00000081181 | 3 |
| ARHGAP12 | ENSG00000165322 | 4 |
| ARHGAP28 | ENSG00000088756 | 5 |
| ARHGAP8  | ENSG00000241484 | 4 |
| ARHGEF15 | ENSG00000198844 | 2 |
| ARHGEF28 | ENSG00000214944 | 4 |
| ARHGEF38 | ENSG00000236699 | 5 |
| ARID3A   | ENSG00000116017 | 5 |
| ARID3B   | ENSG00000179361 | 5 |
| ARIH1    | ENSG00000166233 | 3 |
| ARL6IP6  | ENSG00000177917 | 4 |
| ARPP19   | ENSG00000128989 | 4 |
| ASAP1    | ENSG00000153317 | 4 |
| ASCC3    | ENSG00000112249 | 3 |
| ASIC1    | ENSG00000110881 | 4 |
| ATP2A2   | ENSG00000174437 | 4 |
| ATPAF1   | ENSG00000123472 | 5 |
| B3GNT1   | ENSG00000174684 | 4 |
| B3GNT7   | ENSG00000156966 | 3 |
| BACH1    | ENSG00000156273 | 5 |
| BCAP29   | ENSG00000075790 | 4 |
| BCAT1    | ENSG00000060982 | 5 |
| BCL2L1   | ENSG00000171552 | 4 |
| BDP1     | ENSG00000145734 | 4 |
| BEGAIN   | ENSG00000183092 | 4 |
| BEND4    | ENSG00000188848 | 5 |
| BRCC3    | ENSG00000185515 | 4 |
| BRD3     | ENSG00000169925 | 4 |
| BRF2     | ENSG00000104221 | 2 |
| BRWD3    | ENSG00000165288 | 4 |
| BSDC1    | ENSG00000160058 | 3 |
| BSND     | ENSG00000162399 | 3 |
| BTBD3    | ENSG00000132640 | 4 |
| BZW1     | ENSG00000082153 | 5 |
| C11orf57 | ENSG00000150776 | 4 |

|           |                 |   |
|-----------|-----------------|---|
| C14orf178 | ENSG00000197734 | 3 |
| C14orf28  | ENSG00000179476 | 5 |
| C15orf39  | ENSG00000167173 | 4 |

|              |                 |   |
|--------------|-----------------|---|
| C15orf41     | ENSG00000186073 | 4 |
| C16orf52     | ENSG00000185716 | 4 |
| C18orf21     | ENSG00000141428 | 4 |
| C1GALT1      | ENSG00000106392 | 4 |
| C1orf112     | ENSG00000000460 | 2 |
| C1orf159     | ENSG00000131591 | 4 |
| C1orf200     | ENSG00000179840 | 2 |
| C1QTNF3AMACR | ENSG00000273294 | 3 |
| C20orf194    | ENSG00000088854 | 4 |
| C3orf38      | ENSG00000179021 | 4 |
| C5orf51      | ENSG00000205765 | 4 |
| C8orf58      | ENSG00000241852 | 4 |
| C9orf40      | ENSG00000135045 | 5 |
| CALN1        | ENSG00000183166 | 2 |
| CAMK1        | ENSG00000134072 | 4 |
| CAPRIN2      | ENSG00000110888 | 5 |
| CASP3        | ENSG00000164305 | 4 |
| CASP5        | ENSG00000137757 | 2 |
| CBX5         | ENSG00000094916 | 5 |
| CCDC71L      | ENSG00000253276 | 5 |
| CCL7         | ENSG00000108688 | 4 |
| CCND2        | ENSG00000118971 | 4 |
| CCNF         | ENSG00000162063 | 5 |
| CCNJ         | ENSG00000107443 | 5 |
| CCR7         | ENSG00000126353 | 4 |
| CD200R1      | ENSG00000163606 | 4 |
| CD86         | ENSG00000114013 | 4 |
| CDC25A       | ENSG00000164045 | 2 |
| CDC34        | ENSG00000099804 | 5 |
| CDH8         | ENSG00000150394 | 5 |

|        |                 |   |
|--------|-----------------|---|
| CDKN1A | ENSG00000124762 | 3 |
| CDV3   | ENSG00000091527 | 4 |
| CEP85L | ENSG00000111860 | 4 |
| CERCAM | ENSG00000167123 | 5 |
| CHIA   | ENSG00000134216 | 3 |
| CHRNA7 | ENSG00000175344 | 4 |
| CHSY3  | ENSG00000198108 | 4 |
| CLCN5  | ENSG00000171365 | 5 |
| CLDN12 | ENSG00000157224 | 5 |
| CLDN16 | ENSG00000113946 | 3 |
| CLOCK  | ENSG00000134852 | 4 |

|               |                 |   |
|---------------|-----------------|---|
| CNOT2         | ENSG00000111596 | 5 |
| CNTRL         | ENSG00000119397 | 5 |
| COIL          | ENSG00000121058 | 5 |
| COL15A1       | ENSG00000204291 | 4 |
| COL1A1        | ENSG00000108821 | 4 |
| COL1A2        | ENSG00000164692 | 5 |
| COL27A1       | ENSG00000196739 | 5 |
| COL3A1        | ENSG00000168542 | 5 |
| COL4A1        | ENSG00000187498 | 4 |
| COL4A6        | ENSG00000197565 | 4 |
| COL5A2        | ENSG00000204262 | 4 |
| CPA4          | ENSG00000128510 | 5 |
| CPD           | ENSG00000108582 | 4 |
| CPEB1         | ENSG00000214575 | 5 |
| CPEB2         | ENSG00000137449 | 4 |
| CPEB3         | ENSG00000107864 | 4 |
| CPEB4         | ENSG00000113742 | 4 |
| CPM           | ENSG00000135678 | 5 |
| CRCT1         | ENSG00000169509 | 5 |
| CRTAP         | ENSG00000170275 | 3 |
| CSNK2A1       | ENSG00000101266 | 4 |
| CSTA          | ENSG00000121552 | 4 |
| CTD-2535L24.2 | ENSG00000266076 | 5 |



|          |                 |   |
|----------|-----------------|---|
| CTDSPL2  | ENSG00000137770 | 5 |
| CTNND2   | ENSG00000169862 | 4 |
| CTPS2    | ENSG00000047230 | 5 |
| CTSA     | ENSG00000064601 | 4 |
| CYB561D1 | ENSG00000174151 | 4 |
| CYP19A1  | ENSG00000137869 | 4 |
| CYP2C8   | ENSG00000138115 | 3 |
| CYP2R1   | ENSG00000186104 | 5 |
| CYP4F2   | ENSG00000186115 | 4 |
| CYSLTR1  | ENSG00000173198 | 2 |
| DAB1     | ENSG00000173406 | 4 |
| DAGLA    | ENSG00000134780 | 5 |
| DCAF15   | ENSG00000132017 | 4 |
| DCAF6    | ENSG00000143164 | 2 |
| DCLRE1B  | ENSG00000118655 | 2 |
| DCLRE1C  | ENSG00000152457 | 5 |
| DCUN1D3  | ENSG00000188215 | 4 |
| DDI2     | ENSG00000197312 | 5 |

|         |                 |   |
|---------|-----------------|---|
| DDX19B  | ENSG00000157349 | 5 |
| DDX26B  | ENSG00000165359 | 5 |
| DIAPH2  | ENSG00000147202 | 5 |
| DICER1  | ENSG00000100697 | 5 |
| DLC1    | ENSG00000164741 | 4 |
| DLGAP4  | ENSG00000080845 | 5 |
| DMD     | ENSG00000198947 | 5 |
| DMP1    | ENSG00000152592 | 3 |
| DNA2    | ENSG00000138346 | 5 |
| DNAJA2  | ENSG00000069345 | 4 |
| DNAJC10 | ENSG00000077232 | 4 |
| DOK3    | ENSG00000146094 | 4 |
| DPH3    | ENSG00000154813 | 5 |
| DSCR8   | ENSG00000198054 | 4 |
| DTX2    | ENSG00000091073 | 4 |
| DUSP1   | ENSG00000120129 | 4 |

|           |                 |   |
|-----------|-----------------|---|
| DUSP12    | ENSG00000081721 | 3 |
| DUSP22    | ENSG00000112679 | 5 |
| DVL3      | ENSG00000161202 | 4 |
| DYRK2     | ENSG00000127334 | 4 |
| DZIP1     | ENSG00000134874 | 2 |
| E2F2      | ENSG00000007968 | 5 |
| E2F5      | ENSG00000133740 | 5 |
| E2F6      | ENSG00000169016 | 4 |
| EDEM3     | ENSG00000116406 | 4 |
| EDN1      | ENSG00000078401 | 5 |
| EEF2K     | ENSG00000103319 | 2 |
| EFHD2     | ENSG00000142634 | 4 |
| EGLN2     | ENSG00000269858 | 4 |
| EIF4ENIF1 | ENSG00000184708 | 5 |
| EIF4G2    | ENSG00000110321 | 5 |
| EIF5B     | ENSG00000158417 | 4 |
| ELF4      | ENSG00000102034 | 4 |
| ELK4      | ENSG00000158711 | 3 |
| ENY2      | ENSG00000120533 | 3 |
| EOGT      | ENSG00000163378 | 4 |
| EPHA4     | ENSG00000116106 | 4 |
| EPHB1     | ENSG00000154928 | 4 |
| ERCC6     | ENSG00000225830 | 5 |
| ERO1L     | ENSG00000197930 | 5 |
| ERRFI1    | ENSG00000116285 | 4 |

|          |                 |   |
|----------|-----------------|---|
| ESRP2    | ENSG00000103067 | 4 |
| ETV3     | ENSG00000117036 | 4 |
| EVI2B    | ENSG00000185862 | 4 |
| FAM103A1 | ENSG00000169612 | 5 |
| FAM104A  | ENSG00000133193 | 4 |
| FAM118A  | ENSG00000100376 | 4 |
| FAM135A  | ENSG00000082269 | 4 |
| FAM135B  | ENSG00000147724 | 4 |
| FAM178A  | ENSG00000119906 | 5 |

|          |                 |   |
|----------|-----------------|---|
| FAM189A1 | ENSG00000104059 | 4 |
| FAM214A  | ENSG00000047346 | 5 |
| FAM214B  | ENSG00000005238 | 4 |
| FAM222B  | ENSG00000173065 | 5 |
| FAM71D   | ENSG00000172717 | 2 |
| FAS      | ENSG00000026103 | 4 |
| FAXC     | ENSG00000146267 | 5 |
| FBXL12   | ENSG00000127452 | 5 |
| FBXO15   | ENSG00000141665 | 2 |
| FGD6     | ENSG00000180263 | 4 |
| FGF11    | ENSG00000161958 | 4 |
| FGFR1OP  | ENSG00000213066 | 4 |
| FIGN     | ENSG00000182263 | 5 |
| FKTN     | ENSG00000106692 | 4 |
| FLNA     | ENSG00000196924 | 4 |
| FMO2     | ENSG00000094963 | 4 |
| FNDC3A   | ENSG00000102531 | 5 |
| FNIP1    | ENSG00000217128 | 5 |
| FOXP2    | ENSG00000128573 | 5 |
| FRAS1    | ENSG00000138759 | 5 |
| FRMD4B   | ENSG00000114541 | 5 |
| FRMD5    | ENSG00000171877 | 4 |
| FZD3     | ENSG00000104290 | 4 |
| FZD4     | ENSG00000174804 | 5 |
| GABRA6   | ENSG00000145863 | 4 |
| GALC     | ENSG00000054983 | 4 |
| GALE     | ENSG00000117308 | 4 |
| GALNT1   | ENSG00000141429 | 5 |
| GALNT16  | ENSG00000100626 | 4 |
| GAN      | ENSG00000261609 | 5 |
| GAREM    | ENSG00000141441 | 4 |
| GAS7     | ENSG00000007237 | 5 |

|       |                 |   |
|-------|-----------------|---|
| GATM  | ENSG00000171766 | 5 |
| GCNT4 | ENSG00000176928 | 5 |

|          |                 |   |
|----------|-----------------|---|
| GDAP2    | ENSG00000196505 | 5 |
| GDF6     | ENSG00000156466 | 5 |
| GDPD1    | ENSG00000153982 | 4 |
| GHR      | ENSG00000112964 | 4 |
| GIMAP6   | ENSG00000133561 | 4 |
| GIPC1    | ENSG00000123159 | 4 |
| GJC1     | ENSG00000182963 | 4 |
| GNG5     | ENSG00000174021 | 5 |
| GOLGA4   | ENSG00000144674 | 4 |
| GOLGA6L4 | ENSG00000184206 | 4 |
| GOLT1B   | ENSG00000111711 | 5 |
| GPAM     | ENSG00000119927 | 3 |
| GPATCH2  | ENSG00000092978 | 4 |
| GPATCH8  | ENSG00000186566 | 3 |
| GPC4     | ENSG00000076716 | 5 |
| GPCPD1   | ENSG00000125772 | 4 |
| GPR157   | ENSG00000180758 | 5 |
| GPR26    | ENSG00000154478 | 5 |
| GPR61    | ENSG00000156097 | 4 |
| GREB1L   | ENSG00000141449 | 3 |
| GRHL3    | ENSG00000158055 | 4 |
| GRID2IP  | ENSG00000215045 | 3 |
| GTF2I    | ENSG00000077809 | 4 |
| GXYLT1   | ENSG00000151233 | 5 |
| GYG2     | ENSG00000056998 | 5 |
| HABP4    | ENSG00000130956 | 4 |
| HAND1    | ENSG00000113196 | 5 |
| HDLBP    | ENSG00000115677 | 4 |
| HDX      | ENSG00000165259 | 5 |
| HECTD2   | ENSG00000165338 | 4 |
| HELLS    | ENSG00000119969 | 4 |
| HELZ     | ENSG00000198265 | 4 |
| HFE      | ENSG00000010704 | 4 |
| HIC2     | ENSG00000169635 | 5 |
| HIF1AN   | ENSG00000166135 | 5 |

|        |                 |   |
|--------|-----------------|---|
| HIF3A  | ENSG00000124440 | 5 |
| HIP1   | ENSG00000127946 | 5 |
| HMGA1  | ENSG00000137309 | 4 |
| HOMER2 | ENSG00000103942 | 4 |

|         |                 |   |
|---------|-----------------|---|
| HOOK1   | ENSG00000134709 | 2 |
| HOXA1   | ENSG00000105991 | 5 |
| HOXA9   | ENSG00000078399 | 4 |
| HOXB1   | ENSG00000120094 | 5 |
| HSPA14  | ENSG00000187522 | 4 |
| ICOS    | ENSG00000163600 | 4 |
| IDE     | ENSG00000119912 | 3 |
| IFI44L  | ENSG00000137959 | 2 |
| IFITM10 | ENSG00000244242 | 5 |
| IGDCC3  | ENSG00000174498 | 5 |
| IGDCC4  | ENSG00000103742 | 5 |
| IGF1    | ENSG00000017427 | 4 |
| IGF1R   | ENSG00000140443 | 5 |
| IGF2BP1 | ENSG00000159217 | 5 |
| IGF2BP2 | ENSG00000073792 | 4 |
| IGF2BP3 | ENSG00000136231 | 5 |
| IGLON5  | ENSG00000142549 | 4 |
| IGSF1   | ENSG00000147255 | 4 |
| IKBKE   | ENSG00000143466 | 3 |
| IL10    | ENSG00000136634 | 5 |
| IL13    | ENSG00000169194 | 4 |
| IL22RA1 | ENSG00000142677 | 3 |
| IL6R    | ENSG00000160712 | 4 |
| IMPDH1  | ENSG00000106348 | 4 |
| IMPG2   | ENSG00000081148 | 5 |
| ING3    | ENSG00000071243 | 5 |
| INO80D  | ENSG00000114933 | 4 |
| INSL4   | ENSG00000120211 | 5 |
| INSR    | ENSG00000171105 | 4 |
| INTS2   | ENSG00000108506 | 4 |

|         |                 |   |
|---------|-----------------|---|
| INTS6   | ENSG00000102786 | 5 |
| IRGQ    | ENSG00000167378 | 4 |
| IRS2    | ENSG00000185950 | 5 |
| ITGA7   | ENSG00000135424 | 4 |
| ITGB6   | ENSG00000115221 | 4 |
| KATNAL1 | ENSG00000102781 | 2 |
| KATNBL1 | ENSG00000134152 | 4 |
| KCNE3   | ENSG00000175538 | 2 |
| KCNQ4   | ENSG00000117013 | 4 |
| KCNT1   | ENSG00000107147 | 5 |
| KCTD17  | ENSG00000100379 | 5 |

|               |                 |   |
|---------------|-----------------|---|
| KCTD2         | ENSG00000180901 | 4 |
| KCTD21        | ENSG00000188997 | 5 |
| KHNYN         | ENSG00000100441 | 5 |
| KIAA1161      | ENSG00000164976 | 2 |
| KIAA1958      | ENSG00000165185 | 2 |
| KLHDC8B       | ENSG00000185909 | 5 |
| KLHL31        | ENSG00000124743 | 5 |
| KLHL6         | ENSG00000172578 | 3 |
| KMT2D         | ENSG00000167548 | 5 |
| KMT2E         | ENSG00000005483 | 4 |
| KPNA5         | ENSG00000196911 | 4 |
| KRT5          | ENSG00000186081 | 4 |
| LA16c-431H6.6 | ENSG00000261732 | 5 |
| LBR           | ENSG00000143815 | 4 |
| LCOR          | ENSG00000196233 | 4 |
| LCORL         | ENSG00000178177 | 5 |
| LIMD2         | ENSG00000136490 | 5 |
| LIN28A        | ENSG00000131914 | 5 |
| LIN28B        | ENSG00000187772 | 5 |
| LINGO1        | ENSG00000169783 | 4 |
| LIPH          | ENSG00000163898 | 4 |
| LOR           | ENSG00000203782 | 4 |
| LOXL3         | ENSG00000115318 | 3 |

|        |                 |   |
|--------|-----------------|---|
| LPGAT1 | ENSG00000123684 | 5 |
| LPHN3  | ENSG00000150471 | 4 |
| LRIG2  | ENSG00000198799 | 5 |
| LRP8   | ENSG00000157193 | 5 |
| LRRC17 | ENSG00000128606 | 4 |
| LRRC23 | ENSG00000010626 | 5 |
| LRTOMT | ENSG00000184154 | 4 |
| LTN1   | ENSG00000198862 | 4 |
| LYVE1  | ENSG00000133800 | 2 |
| MACF1  | ENSG00000127603 | 3 |
| MAGEA6 | ENSG00000197172 | 4 |
| MAP3K1 | ENSG00000095015 | 5 |
| MAP4K2 | ENSG00000168067 | 4 |
| MAP4K3 | ENSG00000011566 | 5 |
| MAP4K4 | ENSG00000071054 | 4 |
| MAPK6  | ENSG00000069956 | 5 |
| MAPK8  | ENSG00000107643 | 5 |
| MARS2  | ENSG00000247626 | 5 |

|         |                 |   |
|---------|-----------------|---|
| MASP1   | ENSG00000127241 | 2 |
| MBD2    | ENSG00000134046 | 5 |
| MCCC2   | ENSG00000131844 | 2 |
| MDM4    | ENSG00000198625 | 5 |
| MED28   | ENSG00000118579 | 5 |
| MED8    | ENSG00000159479 | 4 |
| MEF2C   | ENSG00000081189 | 4 |
| MEIS2   | ENSG00000134138 | 3 |
| METTL14 | ENSG00000145388 | 4 |
| MEX3A   | ENSG00000254726 | 4 |
| MFSD12  | ENSG00000161091 | 4 |
| MFSD4   | ENSG00000174514 | 5 |
| MGA     | ENSG00000174197 | 4 |
| MGAT4A  | ENSG00000071073 | 5 |
| MIB1    | ENSG00000101752 | 2 |
| MLLT10  | ENSG00000078403 | 4 |

|         |                 |   |
|---------|-----------------|---|
| MRS2    | ENSG00000124532 | 5 |
| MSH6    | ENSG00000116062 | 2 |
| MTDH    | ENSG00000147649 | 4 |
| MXD1    | ENSG00000059728 | 5 |
| MYB     | ENSG00000118513 | 4 |
| MYCBP   | ENSG00000214114 | 4 |
| MYCN    | ENSG00000134323 | 5 |
| MYO18A  | ENSG00000196535 | 3 |
| NAA30   | ENSG00000139977 | 5 |
| NAP1L1  | ENSG00000187109 | 5 |
| NCR3LG1 | ENSG00000188211 | 5 |
| NDST2   | ENSG00000166507 | 4 |
| NDST3   | ENSG00000164100 | 5 |
| NDUFA4  | ENSG00000189043 | 4 |
| NEDD4   | ENSG00000069869 | 4 |
| NEFM    | ENSG00000104722 | 4 |
| NEK3    | ENSG00000136098 | 4 |
| NFAT5   | ENSG00000102908 | 5 |
| NGF     | ENSG00000134259 | 5 |
| NHLRC3  | ENSG00000188811 | 5 |
| NID2    | ENSG00000087303 | 4 |
| NIPA1   | ENSG00000170113 | 5 |
| NIPAL4  | ENSG00000172548 | 4 |
| NME6    | ENSG00000172113 | 5 |
| NME9    | ENSG00000181322 | 2 |

|         |                 |   |
|---------|-----------------|---|
| NOL4L   | ENSG00000197183 | 5 |
| NPIPA7  | ENSG00000233024 | 4 |
| NR6A1   | ENSG00000148200 | 5 |
| NRAS    | ENSG00000213281 | 5 |
| NT5C3L  | ENSG00000141698 | 4 |
| NTRK3   | ENSG00000140538 | 4 |
| NYNRIN  | ENSG00000205978 | 5 |
| OLFM4   | ENSG00000102837 | 4 |
| ONECUT2 | ENSG00000119547 | 5 |



|         |                 |   |
|---------|-----------------|---|
| ONECUT3 | ENSG00000205922 | 4 |
| OSMR    | ENSG00000145623 | 5 |
| OSTF1   | ENSG00000134996 | 4 |
| OTOF    | ENSG00000115155 | 4 |
| P2RY13  | ENSG00000181631 | 4 |
| P4HA2   | ENSG00000072682 | 3 |
| PAG1    | ENSG00000076641 | 4 |
| PAK6    | ENSG00000259288 | 4 |
| PALD1   | ENSG00000107719 | 4 |
| PAPOLA  | ENSG00000090060 | 2 |
| PAPPA   | ENSG00000182752 | 5 |
| PARD6B  | ENSG00000124171 | 5 |
| PARP8   | ENSG00000151883 | 5 |
| PARS2   | ENSG00000162396 | 4 |
| PAWR    | ENSG00000177425 | 4 |
| PBX1    | ENSG00000185630 | 5 |
| PBX3    | ENSG00000167081 | 5 |
| PCBP4   | ENSG00000090097 | 4 |
| PCDH19  | ENSG00000165194 | 5 |
| PCGF3   | ENSG00000185619 | 4 |
| PCTP    | ENSG00000141179 | 4 |
| PCYOX1L | ENSG00000145882 | 5 |
| PDE12   | ENSG00000174840 | 5 |
| PDPR    | ENSG00000090857 | 4 |
| PDZD9   | ENSG00000155714 | 4 |
| PGAP2   | ENSG00000148985 | 4 |
| PGRMC1  | ENSG00000101856 | 5 |
| PHACTR2 | ENSG00000112419 | 4 |
| PHLDB2  | ENSG00000144824 | 4 |
| PIK3IP1 | ENSG00000100100 | 4 |
| PLA2G3  | ENSG00000100078 | 4 |
| PLCB4   | ENSG00000101333 | 2 |

|         |                 |   |
|---------|-----------------|---|
| PLEKHA8 | ENSG00000106086 | 5 |
| PLEKHG6 | ENSG00000008323 | 5 |

|           |                 |   |
|-----------|-----------------|---|
| PLEKHG7   | ENSG00000187510 | 4 |
| PLEKHO1   | ENSG00000023902 | 4 |
| PLS3      | ENSG00000102024 | 4 |
| PLXND1    | ENSG00000004399 | 3 |
| POGZ      | ENSG00000143442 | 3 |
| POLE      | ENSG00000177084 | 3 |
| POLR2D    | ENSG00000144231 | 3 |
| PORCN     | ENSG00000102312 | 5 |
| POTEE     | ENSG00000188219 | 5 |
| POTEG     | ENSG00000222036 | 5 |
| POTEM     | ENSG00000187537 | 5 |
| POU2F1    | ENSG00000143190 | 5 |
| POU2F2    | ENSG00000028277 | 4 |
| PPAPDC1B  | ENSG00000147535 | 4 |
| PPAPDC2   | ENSG00000205808 | 4 |
| PPARGC1A  | ENSG00000109819 | 4 |
| PPARGC1B  | ENSG00000155846 | 5 |
| PPP1R15B  | ENSG00000158615 | 5 |
| PPP4C     | ENSG00000149923 | 5 |
| PREB      | ENSG00000138073 | 4 |
| PRKAR2A   | ENSG00000114302 | 5 |
| PRLR      | ENSG00000113494 | 3 |
| PRPF38B   | ENSG00000134186 | 4 |
| PRR22     | ENSG00000212123 | 3 |
| PRR23A    | ENSG00000206260 | 5 |
| PRTG      | ENSG00000166450 | 5 |
| PTAFR     | ENSG00000169403 | 5 |
| PTAR1     | ENSG00000188647 | 4 |
| PTCH1     | ENSG00000185920 | 5 |
| PTCHD4    | ENSG00000244694 | 3 |
| PTPRD     | ENSG00000153707 | 5 |
| PTPRK     | ENSG00000152894 | 5 |
| PXDN      | ENSG00000130508 | 4 |
| PXT1      | ENSG00000179165 | 5 |
| RAB11FIP2 | ENSG00000107560 | 4 |

|           |                 |   |
|-----------|-----------------|---|
| RAB11FIP4 | ENSG00000131242 | 2 |
| RAB3GAP2  | ENSG00000118873 | 4 |
| RANBP2    | ENSG00000153201 | 4 |
| RASGRP1   | ENSG00000172575 | 5 |

|                |                 |   |
|----------------|-----------------|---|
| RBFOX1         | ENSG00000078328 | 4 |
| RBFOX2         | ENSG00000100320 | 4 |
| RBMS1          | ENSG00000153250 | 5 |
| RDX            | ENSG00000137710 | 4 |
| REV3L          | ENSG00000009413 | 5 |
| RFWD3          | ENSG00000168411 | 2 |
| RFX6           | ENSG00000185002 | 5 |
| RGS16          | ENSG00000143333 | 5 |
| RICTOR         | ENSG00000164327 | 5 |
| RIF1           | ENSG00000080345 | 3 |
| RIMKLA         | ENSG00000177181 | 2 |
| RIOK3          | ENSG00000101782 | 4 |
| RMDN2          | ENSG00000115841 | 4 |
| RMI2           | ENSG00000175643 | 2 |
| RNF165         | ENSG00000141622 | 2 |
| RNF170         | ENSG00000120925 | 4 |
| RNF217         | ENSG00000146373 | 4 |
| RNF44          | ENSG00000146083 | 4 |
| RNFT1          | ENSG00000189050 | 5 |
| RP11-108O10.8  | ENSG00000258529 | 5 |
| RP11-152F13.5  | ENSG00000196648 | 4 |
| RP11-574K11.31 | ENSG00000272916 | 3 |
| RPS6KB2        | ENSG00000175634 | 5 |
| RRM2           | ENSG00000171848 | 4 |
| RSPO2          | ENSG00000147655 | 5 |
| SCD            | ENSG00000099194 | 5 |
| SCN8A          | ENSG00000196876 | 4 |
| SCYL3          | ENSG00000000457 | 4 |
| SDR42E1        | ENSG00000184860 | 4 |
| SEC14L1        | ENSG00000129657 | 4 |

|          |                 |   |
|----------|-----------------|---|
| SELT     | ENSG00000198843 | 4 |
| SEMA4C   | ENSG00000168758 | 4 |
| SENP2    | ENSG00000163904 | 5 |
| SENP5    | ENSG00000119231 | 4 |
| SESN3    | ENSG00000149212 | 2 |
| SESTD1   | ENSG00000187231 | 4 |
| SFMBT1   | ENSG00000163935 | 4 |
| SFSWAP   | ENSG00000061936 | 5 |
| SH3TC1   | ENSG00000125089 | 4 |
| SIGLEC14 | ENSG00000254415 | 4 |
| SKIDA1   | ENSG00000180592 | 4 |

|          |                 |   |
|----------|-----------------|---|
| SKIL     | ENSG00000136603 | 5 |
| SLC16A10 | ENSG00000112394 | 4 |
| SLC16A9  | ENSG00000165449 | 4 |
| SLC20A1  | ENSG00000144136 | 5 |
| SLC22A23 | ENSG00000137266 | 4 |
| SLC25A18 | ENSG00000182902 | 4 |
| SLC25A24 | ENSG00000085491 | 2 |
| SLC25A27 | ENSG00000153291 | 5 |
| SLC2A12  | ENSG00000146411 | 4 |
| SLC30A1  | ENSG00000170385 | 5 |
| SLC30A4  | ENSG00000104154 | 4 |
| SLC30A6  | ENSG00000152683 | 4 |
| SLC35B1  | ENSG00000121073 | 3 |
| SLC35D2  | ENSG00000130958 | 5 |
| SLC38A2  | ENSG00000134294 | 5 |
| SLC38A9  | ENSG00000177058 | 4 |
| SLC5A11  | ENSG00000158865 | 4 |
| SLC5A6   | ENSG00000138074 | 4 |
| SLC5A9   | ENSG00000117834 | 4 |
| SLC6A5   | ENSG00000165970 | 5 |
| SLCO5A1  | ENSG00000137571 | 4 |
| SMAP1    | ENSG00000112305 | 4 |
| SMARCAD1 | ENSG00000163104 | 5 |

|          |                 |   |
|----------|-----------------|---|
| SMARCC1  | ENSG00000173473 | 5 |
| SMC1A    | ENSG00000072501 | 5 |
| SMCHD1   | ENSG00000101596 | 4 |
| SMIM3    | ENSG00000256235 | 4 |
| SNAP23   | ENSG00000092531 | 4 |
| SNX16    | ENSG00000104497 | 4 |
| SNX25    | ENSG00000109762 | 5 |
| SNX27    | ENSG00000143376 | 3 |
| SOCS4    | ENSG00000180008 | 4 |
| SOX6     | ENSG00000110693 | 4 |
| SPAG16   | ENSG00000144451 | 2 |
| SPEG     | ENSG00000072195 | 3 |
| SRD5A3   | ENSG00000128039 | 4 |
| SREK1IP1 | ENSG00000153006 | 4 |
| SRGAP1   | ENSG00000196935 | 2 |
| SRGAP3   | ENSG00000196220 | 2 |
| SRL      | ENSG00000185739 | 4 |
| ST8SIA1  | ENSG00000111728 | 5 |

|              |                 |   |
|--------------|-----------------|---|
| STARD13      | ENSG00000133121 | 4 |
| STARD3       | ENSG00000131748 | 2 |
| STARD3NL     | ENSG00000010270 | 4 |
| STARD9       | ENSG00000159433 | 3 |
| STK24        | ENSG00000102572 | 4 |
| STRBP        | ENSG00000165209 | 4 |
| STX16-NPEPL1 | ENSG00000254995 | 3 |
| STX3         | ENSG00000166900 | 5 |
| STYX         | ENSG00000198252 | 2 |
| SVIL         | ENSG00000197321 | 4 |
| SWT1         | ENSG00000116668 | 2 |
| SYNC         | ENSG00000162520 | 5 |
| SYNCRIP      | ENSG00000135316 | 5 |
| SYT1         | ENSG00000067715 | 4 |
| SYT11        | ENSG00000132718 | 4 |
| SYT2         | ENSG00000143858 | 4 |

|          |                  |   |
|----------|------------------|---|
| SYT7     | ENSG00000011347  | 4 |
| TAF5     | ENSG000000148835 | 4 |
| TARBP2   | ENSG000000139546 | 5 |
| TBKBP1   | ENSG000000198933 | 5 |
| TECPR2   | ENSG000000196663 | 4 |
| TET2     | ENSG000000168769 | 3 |
| TET3     | ENSG000000187605 | 4 |
| TFAP2A   | ENSG000000137203 | 4 |
| TFEC     | ENSG000000105967 | 2 |
| TFR2     | ENSG000000106327 | 4 |
| TGFBR1   | ENSG000000106799 | 5 |
| THEM4    | ENSG000000159445 | 2 |
| THOC2    | ENSG000000125676 | 4 |
| THRSP    | ENSG000000151365 | 4 |
| TMC7     | ENSG000000170537 | 2 |
| TMED4    | ENSG000000158604 | 4 |
| TMEM135  | ENSG000000166575 | 5 |
| TMEM143  | ENSG000000161558 | 4 |
| TMEM167A | ENSG000000174695 | 4 |
| TMEM194A | ENSG000000166881 | 4 |
| TMEM211  | ENSG000000206069 | 5 |
| TMEM65   | ENSG000000164983 | 4 |
| TMOD2    | ENSG000000128872 | 4 |
| TMPPE    | ENSG000000188167 | 5 |
| TNFRSF1B | ENSG000000028137 | 4 |

|         |                  |   |
|---------|------------------|---|
| TNFSF10 | ENSG000000121858 | 2 |
| TNFSF9  | ENSG000000125657 | 5 |
| TP53    | ENSG000000141510 | 2 |
| TPM2    | ENSG000000198467 | 4 |
| TPP1    | ENSG000000166340 | 5 |
| TRABD   | ENSG000000170638 | 4 |
| TRANK1  | ENSG000000168016 | 5 |
| TRAPPC1 | ENSG000000170043 | 3 |
| TRHDE   | ENSG000000072657 | 4 |

|         |                 |   |
|---------|-----------------|---|
| TRIM67  | ENSG00000119283 | 4 |
| TRIM71  | ENSG00000206557 | 5 |
| TRIP12  | ENSG00000153827 | 4 |
| TRMT10A | ENSG00000145331 | 4 |
| TRMT13  | ENSG00000122435 | 4 |
| TSC1    | ENSG00000165699 | 4 |
| TSPEAR  | ENSG00000175894 | 4 |
| TTC14   | ENSG00000163728 | 3 |
| TTC26   | ENSG00000105948 | 5 |
| TTC31   | ENSG00000115282 | 5 |
| TTL     | ENSG00000114999 | 5 |
| TTLL4   | ENSG00000135912 | 5 |
| TXLNG   | ENSG00000086712 | 5 |
| UFM1    | ENSG00000120686 | 4 |
| UGCG    | ENSG00000148154 | 2 |
| UGT3A1  | ENSG00000145626 | 3 |
| UHRF2   | ENSG00000147854 | 5 |
| ULK3    | ENSG00000140474 | 5 |
| USP12   | ENSG00000152484 | 4 |
| USP21   | ENSG00000143258 | 4 |
| USP24   | ENSG00000162402 | 5 |
| USP38   | ENSG00000170185 | 5 |
| USP44   | ENSG00000136014 | 5 |
| USP47   | ENSG00000170242 | 4 |
| UST     | ENSG00000111962 | 3 |
| UTRN    | ENSG00000152818 | 5 |
| VASH2   | ENSG00000143494 | 3 |
| VEZT    | ENSG00000028203 | 3 |
| VPS33A  | ENSG00000139719 | 4 |
| VSTM5   | ENSG00000214376 | 5 |
| WASL    | ENSG00000106299 | 4 |
| WBP1L   | ENSG00000166272 | 2 |

|       |                 |   |
|-------|-----------------|---|
| WDFY4 | ENSG00000128815 | 5 |
| WDR11 | ENSG00000120008 | 4 |

|         |                 |   |
|---------|-----------------|---|
| WNT9A   | ENSG00000143816 | 5 |
| XK      | ENSG00000047597 | 5 |
| XKR4    | ENSG00000206579 | 5 |
| XKR8    | ENSG00000158156 | 5 |
| XPOT    | ENSG00000184575 | 4 |
| XRN1    | ENSG00000114127 | 4 |
| XYLT2   | ENSG00000015532 | 4 |
| YOD1    | ENSG00000180667 | 5 |
| YY1     | ENSG00000100811 | 3 |
| ZBTB10  | ENSG00000205189 | 3 |
| ZBTB26  | ENSG00000171448 | 5 |
| ZBTB37  | ENSG00000185278 | 2 |
| ZC3H3   | ENSG00000014164 | 4 |
| ZCCHC9  | ENSG00000131732 | 5 |
| ZFHX4   | ENSG00000091656 | 4 |
| ZFYVE26 | ENSG00000072121 | 5 |
| ZNF10   | ENSG00000256223 | 4 |
| ZNF200  | ENSG00000010539 | 4 |
| ZNF202  | ENSG00000166261 | 4 |
| ZNF275  | ENSG00000063587 | 4 |
| ZNF280B | ENSG00000198477 | 5 |
| ZNF341  | ENSG00000131061 | 5 |
| ZNF343  | ENSG00000088876 | 3 |
| ZNF347  | ENSG00000197937 | 4 |
| ZNF354B | ENSG00000178338 | 3 |
| ZNF429  | ENSG00000197013 | 4 |
| ZNF432  | ENSG00000256087 | 4 |
| ZNF451  | ENSG00000112200 | 3 |
| ZNF462  | ENSG00000148143 | 4 |
| ZNF512B | ENSG00000196700 | 5 |
| ZNF543  | ENSG00000178229 | 3 |
| ZNF577  | ENSG00000161551 | 4 |
| ZNF583  | ENSG00000198440 | 4 |
| ZNF620  | ENSG00000177842 | 4 |
| ZNF644  | ENSG00000122482 | 5 |



|        |                 |   |
|--------|-----------------|---|
| ZNF689 | ENSG00000156853 | 5 |
| ZNF710 | ENSG00000140548 | 5 |
| ZNF738 | ENSG00000172687 | 5 |
| ZNF774 | ENSG00000196391 | 4 |
| ZNF784 | ENSG00000179922 | 4 |
| ZNF843 | ENSG00000176723 | 4 |
| ZNF880 | ENSG00000221923 | 4 |
| ZPLD1  | ENSG00000170044 | 4 |
| ZSWIM5 | ENSG00000162415 | 4 |
